# Supplementary material for: Improving γ-Oryzanol and γ-Aminobutyric Acid Contents in Rice Beverage Amazake Produced with Brown, Milled and Germinated Rices
Source: MDPI journal article supplement (doi:10.3390/foods12071476), 2023-03-31
Supplement: s1 [file s1]

## Supplementary Material (S1)

**Table S1.** Raw data used to fit the response surface design model according to Table 1, RSD (%), and Grubbs distance for the three repetitions. Numbers in bold represent the excluded outliers and criteria of exclusion. When the RSD criteria (>20%) was used, the selected outlier was identified through the highest Grubbs' distance (underlined values)

| <b>α-amylase activity (CU/g)</b> |      |      |             |                  |       |       |              |             |             |             |            |                  |              |              |  |                 |      |             |            |
|----------------------------------|------|------|-------------|------------------|-------|-------|--------------|-------------|-------------|-------------|------------|------------------|--------------|--------------|--|-----------------|------|-------------|------------|
| Brown rice                       |      |      |             |                  |       |       |              | Milled rice |             |             |            |                  |              |              |  | Germinated rice |      |             |            |
| Raw data                         |      |      |             | Grubbs' distance |       |       |              | Raw data    |             |             |            | Grubbs' distance |              |              |  | Raw data        |      |             |            |
| R1                               | R2   | R3   | RSD (%)     | R1               | R2    | R3    |              | R1          | R2          | R3          | RSD (%)    | R1               | R2           | R3           |  | R1              | R2   | R3          | RSD (%)    |
| P1                               | 3.31 | 2.81 | 3.73        | 14%              | 0.053 | 1.026 | 0.972        | <b>4.04</b> | 3.05        | 2.39        | <b>26%</b> | <u>1.058</u>     | 0.130        | 0.929        |  | 1.19            | 1.37 | 1.22        | 8%         |
| P2                               | 1.36 | 1.73 | <b>2.14</b> | <b>23%</b>       | 0.983 | 0.033 | <u>1.016</u> | 1.42        | 1.85        | 1.99        | 17%        | 1.121            | 0.321        | 0.800        |  | 1.52            | 1.30 | 1.46        | 8%         |
| P3                               | 3.15 | 2.70 | 2.72        | 9%               | 1.153 | 0.633 | <u>0.520</u> | 2.42        | 2.90        | 2.59        | 9%         | 0.891            | 1.082        | 0.191        |  | <b>1.04</b>     | 1.49 | 1.77        | <b>26%</b> |
| P4                               | 18.4 | 23.5 | 21.3        | 12%              | 1.040 | 0.955 | 0.085        | 18.0        | 19.6        | 23.3        | 13%        | 0.842            | 0.263        | 1.105        |  | 2.34            | 3.27 | 3.09        | 17%        |
| P5                               | 73.2 | 65.0 | 69.7        | 6%               | 0.951 | 1.043 | 0.092        | 72.1        | 71.2        | 94.7        | 17%        | 0.542            | 0.612        | 1.154        |  | 1.87            | 2.03 | 1.73        | 8%         |
| P6                               | 87.6 | 65.1 | 68.8        | 16%              | 1.141 | 0.726 | 0.415        | 88.5        | 74.8        | 79.9        | 9%         | 1.076            | 0.901        | 0.175        |  | 1.90            | 1.87 | 1.89        | 1%         |
| P7                               | 17.5 | 21.5 | 16.1        | 15%              | 0.305 | 1.117 | 0.812        | 18.8        | <b>29.0</b> | 23.0        | <b>22%</b> | 0.932            | <u>1.057</u> | 0.125        |  | 1.52            | 1.69 | <b>0.98</b> | <b>26%</b> |
| P8                               | 17.0 | 13.2 | 16.7        | 13%              | 0.653 | 1.151 | 0.498        | 17.1        | 13.2        | 19.6        | 19%        | 0.149            | <u>1.066</u> | 0.917        |  | 3.84            | 3.93 | 3.83        | 1%         |
| P9                               | 19.3 | 22.8 | 22.0        | 8%               | 1.127 | 0.781 | 0.346        | 18.8        | 20.6        | <b>13.3</b> | <b>22%</b> | 0.319            | 0.802        | <u>1.121</u> |  | 3.72            | 3.39 | 3.21        | 8%         |
| P10                              | 14.4 | 14.4 | <b>13.6</b> | 3%               | 0.591 | 0.563 | <b>1.155</b> | 3.12        | 3.13        | 3.08        | 1%         | 0.377            | 0.757        | 1.134        |  | 1.80            | 2.42 | 2.25        | 15%        |

  

| <b>GABA (mg/100g)</b> |     |     |         |                  |       |       |       |             |     |     |         |                  |       |       |  |                 |     |     |         |
|-----------------------|-----|-----|---------|------------------|-------|-------|-------|-------------|-----|-----|---------|------------------|-------|-------|--|-----------------|-----|-----|---------|
| Brown rice            |     |     |         |                  |       |       |       | Milled rice |     |     |         |                  |       |       |  | Germinated rice |     |     |         |
| Raw data              |     |     |         | Grubbs' distance |       |       |       | Raw data    |     |     |         | Grubbs' distance |       |       |  | Raw data        |     |     |         |
| R1                    | R2  | R3  | RSD (%) | R1               | R2    | R3    |       | R1          | R2  | R3  | RSD (%) | R1               | R2    | R3    |  | R1              | R2  | R3  | RSD (%) |
| P1                    | 141 | 143 | 131     | 4%               | 0.394 | 0.743 | 1.137 | 146         | 175 | 169 | 9%      | 1.132            | 0.762 | 0.370 |  | 51              | 48  | 53  | 5%      |
| P2                    | 181 | 205 | 191     | 6%               | 0.939 | 1.052 | 0.113 | 185         | 181 | 178 | 2%      | 1.052            | 0.113 | 0.938 |  | 212             | 212 | 214 | 1%      |
| P3                    | 188 | 206 | 147     | 17%              | 0.256 | 0.847 | 1.103 | 186         | 155 | 162 | 10%     | 1.123            | 0.793 | 0.331 |  | 125             | 106 | 117 | 8%      |
| P4                    | 183 | 189 | 195     | 3%               | 0.959 | 0.077 | 1.036 | 169         | 166 | 163 | 2%      | 0.963            | 0.070 | 1.033 |  | 239             | 211 | 228 | 6%      |
| P5                    | 251 | 253 | 264     | 3%               | 0.725 | 0.416 | 1.141 | 244         | 205 | 206 | 10%     | 1.154            | 0.613 | 0.541 |  | 181             | 178 | 177 | 1%      |
| P6                    | 233 | 267 | 263     | 7%               | 1.148 | 0.684 | 0.463 | 224         | 211 | 215 | 3%      | 1.100            | 0.855 | 0.245 |  | 171             | 188 | 172 | 5%      |
| P7                    | 155 | 153 | 158     | 2%               | 0.020 | 1.010 | 0.990 | 221         | 206 | 210 | 4%      | 1.122            | 0.797 | 0.325 |  | 207             | 202 | 198 | 2%      |
| P8                    | 142 | 173 | 161     | 10%              | 1.066 | 0.918 | 0.148 | <b>230</b>  | 198 | 198 | 9%      | <b>1.155</b>     | 0.560 | 0.594 |  | 254             | 247 | 252 | 2%      |
| P9                    | 213 | 207 | 203     | 2%               | 1.055 | 0.122 | 0.934 | 196         | 199 | 197 | 1%      | 0.883            | 1.086 | 0.203 |  | 167             | 166 | 167 | 1%      |
| P10                   | 132 | 130 | 139     | 4%               | 0.359 | 0.771 | 1.130 | 195         | 187 | 196 | 3%      | 0.422            | 1.142 | 0.720 |  | 247             | 256 | 237 | 4%      |

  

| <b>Starch (g/100g)</b> |      |             |         |                  |       |              |       |             |      |      |         |                  |       |       |  |                 |      |             |         |
|------------------------|------|-------------|---------|------------------|-------|--------------|-------|-------------|------|------|---------|------------------|-------|-------|--|-----------------|------|-------------|---------|
| Brown rice             |      |             |         |                  |       |              |       | Milled rice |      |      |         |                  |       |       |  | Germinated rice |      |             |         |
| Raw data               |      |             |         | Grubbs' distance |       |              |       | Raw data    |      |      |         | Grubbs' distance |       |       |  | Raw data        |      |             |         |
| R1                     | R2   | R3          | RSD (%) | R1               | R2    | R3           |       | R1          | R2   | R3   | RSD (%) | R1               | R2    | R3    |  | R1              | R2   | R3          | RSD (%) |
| P1                     | 65.9 | 66.0        | 66.8    | 1%               | 0.718 | 0.425        | 1.142 | 65.3        | 64.5 | 66.5 | 2%      | 0.130            | 0.929 | 1.059 |  | 73.8            | 70.3 | 71.6        | 2%      |
| P2                     | 67.5 | 67.3        | 67.5    | 0%               | 0.327 | 1.123        | 0.795 | <b>61.8</b> | 62.2 | 62.2 | 0%      | <b>1.155</b>     | 0.582 | 0.573 |  | 71.4            | 72.3 | 72.5        | 1%      |
| P3                     | 62.0 | 63.6        | 62.7    | 1%               | 0.988 | 1.011        | 0.023 | 65.8        | 65.5 | 65.0 | 1%      | 0.963            | 0.071 | 1.033 |  | 72.8            | 64.7 | 65.2        | 7%      |
| P4                     | 59.0 | 58.8        | 59.0    | 0%               | 0.639 | 1.152        | 0.514 | 58.4        | 58.9 | 58.2 | 1%      | 0.349            | 1.128 | 0.779 |  | 64.8            | 63.2 | 63.4        | 1%      |
| P5                     | 56.0 | 55.9        | 56.0    | 0%               | 0.456 | 1.147        | 0.691 | 55.9        | 55.4 | 56.0 | 1%      | 0.377            | 1.134 | 0.757 |  | 63.5            | 62.9 | 61.7        | 2%      |
| P6                     | 56.0 | 55.8        | 56.0    | 0%               | 0.670 | 1.149        | 0.480 | 56.1        | 55.5 | 55.5 | 1%      | 1.146            | 0.452 | 0.694 |  | 61.6            | 63.5 | 62.9        | 2%      |
| P7                     | 65.5 | <b>65.0</b> | 65.5    | 0%               | 0.581 | <b>1.155</b> | 0.574 | 58.6        | 59.2 | 58.9 | 1%      | 0.925            | 1.061 | 0.136 |  | 61.0            | 61.6 | 58.9        | 2%      |
| P8                     | 52.5 | 52.6        | 53.0    | 0%               | 0.622 | 0.531        | 1.154 | 63.4        | 61.9 | 63.4 | 1%      | 0.526            | 1.153 | 0.627 |  | 58.7            | 58.7 | <b>61.2</b> | 2%      |
| P9                     | 59.3 | 59.0        | 58.7    | 0%               | 0.980 | 0.038        | 1.019 | 67.3        | 66.7 | 67.5 | 1%      | 0.386            | 1.135 | 0.750 |  | 61.6            | 61.6 | 62.0        | 0%      |
| P10                    | 65.8 | 66.0        | 66.2    | 0%               | 1.067 | 0.152        | 0.915 | 59.6        | 59.5 | 58.8 | 1%      | 0.660            | 0.491 | 1.151 |  | 58.0            | 58.1 | 58.3        | %       |
